# Supplementary material for: Circadian plasticity evolves through regulatory changes in a neuropeptide gene
Source: PubMed Central journal article supplement — Nature. 2024 Oct 16;635(8040):951–9. doi: 10.1038/s41586-024-08056-x (PMC11602725; doi:10.1038/s41586-024-08056-x), 2024-10-16
Supplement: 41586_2024_8056_MOESM1_ESM.pdf [file 41586_2024_8056_MOESM1_ESM.pdf]

---

**Supplementary information**

---

**Circadian plasticity evolves through  
regulatory changes in a neuropeptide gene**

---

In the format provided by the  
authors and unedited

**Supplementary Table 1. *Drosophila* strains.**

| Stock Name                           | Genotype                                                                                                         | Species                | Reference          | Hybridised |
|--------------------------------------|------------------------------------------------------------------------------------------------------------------|------------------------|--------------------|------------|
| Canton-S (CS)                        | <i>wt</i>                                                                                                        | <i>D. melanogaster</i> | RRID:BDSC_64349    | N/A        |
| Oregon-R (OR)                        | <i>wt</i>                                                                                                        | <i>D. melanogaster</i> | RRID:BDSC_2376     | N/A        |
| LZV L72                              | <i>wt</i>                                                                                                        | <i>D. melanogaster</i> | PMID:24920013      | N/A        |
| LZV L76                              | <i>wt</i>                                                                                                        | <i>D. melanogaster</i> | PMID:24920013      | N/A        |
| LZV A10                              | <i>wt</i>                                                                                                        | <i>D. melanogaster</i> | PMID:24920013      | N/A        |
| MD221                                | <i>wt</i>                                                                                                        | <i>D. simulans</i>     | PMID:24920013      | N/A        |
| MD242                                | <i>wt</i>                                                                                                        | <i>D. simulans</i>     | PMID:24920013      | N/A        |
| LZV L47                              | <i>wt</i>                                                                                                        | <i>D. simulans</i>     | PMID:24920013      | N/A        |
| <i>Dsim04</i>                        | <i>wt</i>                                                                                                        | <i>D. simulans</i>     | DSSC 140210251.004 | N/A        |
| <i>Dsim196</i>                       | <i>wt</i>                                                                                                        | <i>D. simulans</i>     | DSSC 140210251.196 | N/A        |
| <i>Dsec07</i>                        | <i>wt</i>                                                                                                        | <i>D. sechellia</i>    | DSSC 140210248.07  | N/A        |
| <i>Dsec13</i>                        | <i>wt</i>                                                                                                        | <i>D. sechellia</i>    | DSSC 140210248.13  | N/A        |
| <i>Dsec28</i>                        | <i>wt</i>                                                                                                        | <i>D. sechellia</i>    | DSSC 140210248.28  | N/A        |
| <i>Dsec19</i>                        | <i>wt</i>                                                                                                        | <i>D. sechellia</i>    | DSSC 140210248.19  | N/A        |
| <i>Dsec21</i>                        | <i>wt</i>                                                                                                        | <i>D. sechellia</i>    | DSSC 140210248.21  | N/A        |
| <i>Dsec30</i>                        | <i>wt</i>                                                                                                        | <i>D. sechellia</i>    | DSSC 140210248.30  | N/A        |
| <i>Dsec31</i>                        | <i>wt</i>                                                                                                        | <i>D. sechellia</i>    | DSSC 140210248.31  | N/A        |
| <i>Dsec32</i>                        | <i>wt</i>                                                                                                        | <i>D. sechellia</i>    | DSSC 140210248.32  | N/A        |
| <i>Dmau90</i>                        | <i>wt</i>                                                                                                        | <i>D. mauritiana</i>   | DSSC 140210241.90  | N/A        |
| <i>Dmau91</i>                        | <i>wt</i>                                                                                                        | <i>D. mauritiana</i>   | DSSC 140210241.91  | N/A        |
| <i>W1118</i>                         | <i>W1118</i>                                                                                                     | <i>D. melanogaster</i> | RRID:BDSC_3605     | 07 and 28  |
| Würzburg Canton-S (CS <sup>W</sup> ) | <i>wt</i>                                                                                                        | <i>D. melanogaster</i> | Gift of C. Förster | 07 and 28  |
| <i>Pdf<sup>01</sup></i>              | <i>Pdf<sup>01</sup></i> (in CS <sup>W</sup> background)                                                          | <i>D. melanogaster</i> | Gift of C. Förster | 07 and 28  |
| <i>Hr38</i>                          | <i>w*</i> ; <i>dpy ov1 bw1 Hr38<sup>56</sup>/CyO</i> ,<br><i>P{GAL4-twi.G}2.2</i> ,<br><i>P{UAS-2xEGFP}AH2.2</i> | <i>D. melanogaster</i> | RRID:BDSC_76590    | 07 and 28  |

|                                   |                                                                         |                        |                                                    |                       |
|-----------------------------------|-------------------------------------------------------------------------|------------------------|----------------------------------------------------|-----------------------|
| <i>Clk</i>                        | <i>Clk<sup>out</sup></i>                                                | <i>D. melanogaster</i> | RRID:BDSC_56754                                    | 07 and 28             |
| <i>PDP1</i>                       | <i>w<sup>1118</sup>; Pdp1<sup>3135</sup>/TM3, Sb1</i>                   | <i>D. melanogaster</i> | RRID:BDSC_80925                                    | 07 and 28             |
| <i>cyc</i>                        | <i>cyc<sup>01</sup></i>                                                 | <i>D. melanogaster</i> | RRID:BDSC_80929                                    | 07 and 28             |
| <i>scro</i>                       | <i>scro<sup>Z211</sup></i>                                              | <i>D. melanogaster</i> | RRID:BDSC_81875                                    | 07 and 28             |
| <i>cwo</i>                        | <i>W<sup>1118</sup>;<br/>PBac{RB}cwo[e04207]/T M6B, Tb1</i>             | <i>D. melanogaster</i> | RRID:BDSC_85593                                    | 07 and 28             |
| <i>Cry</i>                        | <i>w<sup>1118</sup>; ss cry<sup>b</sup></i>                             | <i>D. melanogaster</i> | RRID:BDSC_80921                                    | 07 and 28             |
| <i>Df(vri)</i>                    | <i>w<sup>1118</sup>; Df(2L)Exel6011,<br/>P{XP-U}Exel6011/CyO</i>        | <i>D. melanogaster</i> | RRID:BDSC_7497                                     | 07 and 28             |
| <i>Rh7</i>                        | <i>y[1]; Rh7<sup>0</sup></i>                                            | <i>D. melanogaster</i> | RRID:BDSC_83716                                    | 07, not 28            |
| <i>Jet<sup>c</sup></i>            | <i>y[1] w[*]; jet<sup>c</sup></i>                                       | <i>D. melanogaster</i> | RRID:BDSC_27641                                    | No                    |
| <i>Jet<sup>f</sup></i>            | <i>y[1] w[*]; jet<sup>f</sup></i>                                       | <i>D. melanogaster</i> | RRID:BDSC_27641                                    | No                    |
| <i>Df(Jet)</i>                    | <i>w<sup>1118</sup>; Df(2L)ED7853,<br/>P{3'.RS5+3.3}ED7853/S M6a</i>    | <i>D. melanogaster</i> | RRID:BDSC_24124                                    | 07 and 28             |
| <i>CCHa1</i>                      | <i>y[1] w[*];<br/>Mi{y[+mDint2]=MIC}CCHa<br/>1[MI09190]</i>             | <i>D. melanogaster</i> | RRID:BDSC_51261                                    | 07, poorly<br>with 28 |
| <i>ITP</i>                        | <i>w<sup>1118</sup>;<br/>PBac{w[+mC]=RB}ITP[e0 2889]/CyO</i>            | <i>D. melanogaster</i> | RRID:BDSC_85570                                    | 28                    |
| <i>tim</i>                        | <i>y[1] w[*]; tim<sup>01</sup></i>                                      | <i>D. melanogaster</i> | RRID:BDSC_80922                                    | No                    |
| <i>Df(tim)</i>                    | <i>y[1] w[*]; Df(2L)drm-P2,<br/>P{lacW}ND-<br/>PDSWk10101/SM6b</i>      | <i>D. melanogaster</i> | RRID:BDSC_6507                                     | No                    |
| <i>sr</i>                         | <i>y[1] w[*]; P{neoFRT}82B sr<sup>155</sup>/TM3,<br/>Sb<sup>1</sup></i> | <i>D. melanogaster</i> | RRID:BDSC_36535                                    | No                    |
| <i>Fer2</i>                       | <i>w<sup>1118</sup>;<br/>PBac{RB}Fer2[e03248]</i>                       | <i>D. melanogaster</i> | RRID:BDSC_86028                                    | 07, poorly<br>with 28 |
| <i>DmelPdf-Gal4</i>               | <i>y[1] w67c23;;P{Dmel-PdfGal4}attP2</i>                                | <i>D. melanogaster</i> | <i>This work</i>                                   | N/A                   |
| <i>DsecPdf-Gal4</i>               | <i>y[1] w67c23;;P{Dsec-PdfGal4}attP2</i>                                | <i>D. melanogaster</i> | <i>This work</i>                                   | N/A                   |
| <i>DmelPdf-CD4:tdGFP</i>          | <i>y[1]<br/>w67c23;;P{DmelPdfCD4:tdGFP}attP2</i>                        | <i>D. melanogaster</i> | <i>This work</i>                                   | N/A                   |
| <i>DsecPdf-CD4:tdGFP</i>          | <i>y[1]<br/>w67c23;;P{DsecPdfCD4:tdGFP}attP2</i>                        | <i>D. melanogaster</i> | <i>This work</i>                                   | N/A                   |
| <i>UAS-Pdf<sup>RNAi</sup></i>     | <i>y[1] v[1]; P{y[+t7.7]<br/>v[+t1.8]=TRiP.JF01820}att<br/>P2</i>       | <i>D. melanogaster</i> | RRID:BDSC_25802                                    | N/A                   |
| <i>Dmel-Pdf, Pdf<sup>01</sup></i> | <i>y[1] w[*];; P{DmelPdf<sup>f</sup>}attP2, Pdf<sup>01</sup></i>        | <i>D. melanogaster</i> | <i>This work (two<br/>independent<br/>strains)</i> | N/A                   |

|                                   |                                                                  |                        |                                            |     |
|-----------------------------------|------------------------------------------------------------------|------------------------|--------------------------------------------|-----|
| <i>Dsec-Pdf, Pdf<sup>01</sup></i> | <i>y[1] w[*];; P{DsecPdf<sup>1</sup>}attP2, Pdf<sup>01</sup></i> | <i>D. melanogaster</i> | <i>This work (two independent strains)</i> | N/A |
|-----------------------------------|------------------------------------------------------------------|------------------------|--------------------------------------------|-----|

### Supplementary Table 2. Antibodies.

| Antibody                      | Dilution | Source                                   | Identifier              |
|-------------------------------|----------|------------------------------------------|-------------------------|
| Mouse anti-Pdf (C7)           | 1:400    | Developmental Studies Hybridoma Bank     | AB_760350<br>AB_2315084 |
| Rabbit anti-GFP               | 1:1000   | Molecular Probes, Jackson ImmunoResearch | AB_221570               |
| Rat anti-Cadherin-N (DN-Ex#8) | 1:25     | Developmental Studies Hybridoma Bank     | AB_528121               |
| Goat Alexa488 anti-mouse      | 1:100    | Molecular Probes, Jackson ImmunoResearch | AB_2338840              |
| Goat Alexa488 anti-rabbit     | 1:100    | Molecular Probes, Jackson ImmunoResearch | AB_2338049              |
| Donkey Cy5 anti-rat           | 1:200    | Molecular Probes, Jackson ImmunoResearch | AB_2340672              |

### Supplementary Table 3. Oligonucleotides.

| Purpose                                                           | PCR product                                            | Sequences (5'-3') sense / antisense                                                                   |
|-------------------------------------------------------------------|--------------------------------------------------------|-------------------------------------------------------------------------------------------------------|
| <i>Pdf</i> gene sequencing                                        | CDS + 5'regulatory region I                            | catttctctcgacgcacca / ccaactgccgagctagctat                                                            |
|                                                                   | 5'-regulatory region II                                | aaacttaatagctagctcggcag / aatgtggctgcatggaaagt                                                        |
|                                                                   | 5'-regulatory region III                               | aaacattgacccaactccgc / gttcatcctaccagcgcc                                                             |
| Entry clone for <i>Pdf</i> 5'-regulatory region (Gateway cloning) | 5' regulatory region (~2.4 kb upstream of start codon) | ggggacaactttgtacaaaaaagtggcaccggtccacatagtgccagta / ggggacaactttgtacaagaaagtggcaatagtccgaggagctggaagg |
| <i>Pdf</i> rescue attP2 insertion (Gibson Assembly)               | 5' regulatory region (~2.4 kb upstream of start codon) | gtcgacactagtggatctctagagttgtaccagattcaagtcgaacaatcc / tcggactaatggctcgctacacgtacct                    |
| <i>Pdf</i> rescue attP2 insertion (Gibson Assembly)               | CDS                                                    | cgagccattagtccgaggagctggaagga / cgcttcatggtgtgaagctggtccacatagtgccagtatatgat                          |
